# Supplementary material
Source: Research Square preprint supplement (doi:10.21203/rs.3.rs-9671456/v1)

**Supplementary Materials**

**Characteristics of survey respondents**

A total of 147 healthcare personnel involved in hospital pharmacy services participated in the survey. Most respondents were pharmacists (96.60%), while a small proportion consisted of nurses (2.72%) and one medical doctor (0.68%) who had responsibilities related to hospital pharmacy services because of workforce shortages in some hospitals. Most respondents were female (72.11%), with a mean age of 36.92 ± 7.02 years (range: 22–59 years). Regarding educational background, the majority held a bachelor’s degree in pharmacy (57.82%), followed by undergraduate pharmacy diploma qualifications (26.53%). Detailed participant characteristics are presented in Supplementary Table S1.

**Table S1. Characteristics of survey respondents (n = 147)**

| **Variable** | **n (%) or Mean ± SD** |
| --- | --- |
| Sex |  |
| Male | 41 (27.89) |
| Female | 106 (72.11) |
| Age (years) |  |
| Mean ± SD | 36.92 ± 7.02 |
| Range | 22–59 |
| Profession/Field |  |
| Pharmacy | 142 (96.60) |
| Medicine | 1 (0.68) |
| Nursing | 4 (2.72) |
| Educational level |  |
| Training of pharmacy | 2 (1.36) |
| Undergraduate diploma of pharmacy | 39 (26.53) |
| Diploma degree of pharmacy | 14 (9.52) |
| Bachelor’s degree of pharmacy | 85 (57.82) |
| Master’s degree of pharmacy | 1 (0.68) |
| Master’s degree of public health | 1 (0.68) |
| Undergraduate diploma of nursing | 4 (2.72) |
| Diploma degree of medicine | 1 (0.68) |

**Note:** A small number of nurses and one medical doctor were included because they were assigned to hospital pharmacy service duties in hospitals experiencing pharmacist workforce shortages.

**Table S2. Item-level relevance and importance ratings for all competency elements**

| **Domain** | **Competency** | **Relevance agreement (%)**† | **Importance agreement (%)**† | **Mean relevance score**‡ |
| --- | --- | --- | --- | --- |
| I. Direct patient care | 1. Assessing patients | 86.39 | 94.56 | 3.90 ± 1.46 |
| 2. Evaluating drug therapy | 98.64 | 99.32 | 4.56 ± 0.83 |
| 3. Developing treatment plans | 92.52 | 97.96 | 3.88 ± 1.25 |
| 4. Monitoring outcomes | 82.32 | 91.84 | 3.61 ± 1.52 |
| 5. Team collaborate | 91.15 | 95.92 | 4.04 ± 1.32 |
| 6. Applying knowledge | 86.4 | 91.84 | 3.78 ± 1.45 |
| II. Pharmacotherapy knowledge | 7. Demonstrating knowledge | 78.92 | 87.76 | 3.23 ± 1.51 |
| 8. Locating evidence | 70.08 | 80.95 | 2.87 ± 1.56 |
| 9. Using evidence | 80.95 | 87.76 | 3.47 ± 1.56 |
| 10. BPS certification | 78.22 | 90.48 | 3.39 ± 1.60 |
| 11. Knowledge maintaining | 89.79 | 93.88 | 3.99 ± 1.39 |
| III. Systems-based care and population health | 12. Using systems | 74.16 | 87.76 | 3.34 ± 1.64 |
| 13. Participating | 76.2 | 90.48 | 3.20 ± 1.59 |
| 14. Resolving systems | 94.55 | 98.64 | 4.11 ± 1.21 |
| 15. Applying systems | 76.87 | 86.39 | 3.24 ± 1.57 |
| 16. Improving systems | 86.41 | 94.56 | 3.54 ± 1.49 |
| 17. Designing systems | 88.43 | 95.24 | 3.76 ± 1.40 |
| IV. Communication | 18. Effective communication | 87.08 | 89.12 | 3.73 ± 1.43 |
| 19. Consultations | 86.4 | 92.52 | 3.65 ± 1.44 |
| 20. Writing communication | 82.99 | 93.88 | 3.66 ± 1.48 |
| 21. Verbal communication | 93.87 | 95.92 | 4.10 ± 1.22 |
| 22. Appropriate communication | 93.19 | 97.28 | 4.12 ± 1.24 |
| V. Professionalism | 23. Upholding professional | 97.95 | 99.32 | 4.75 ± 0.76 |
| 24. Committing professional | 96.6 | 96.6 | 4.43 ± 1.02 |
| 25. Credible model | 97.28 | 98.64 | 4.50 ± 0.93 |
| 26. Advancing professional | 91.15 | 97.28 | 4.27 ± 1.27 |
| VI. Continuing professional development | 27. Committing CPD | 95.24 | 97.28 | 4.29 ± 1.14 |
| 28. Demonstrating CPD | 95.91 | 98.64 | 4.33 ± 1.04 |
| 29. Identifying CPD | 92.51 | 96.6 | 4.08 ± 1.28 |
| 30. Providing CPD | 85.71 | 96.6 | 3.81 ± 1.45 |
| 31. Maintain BPS | 76.19 | 93.88 | 3.54 ± 1.64 |

**Note:** † Percentage of respondents who agreed that the competency was relevant/important in the Lao context. ‡ Mean relevance score based on a 5-point Likert scale (1 = less relevant to 5 = highly relevant).

**Abbreviations:** BPS – board of pharmacy specialties, CPD - continuing professional development

**Table S3. Final clinical pharmacy competency framework and competency elements for Lao PDR**

| **Domain** | **Competency elements** | **Short name** |
| --- | --- | --- |
| **I. Direct patient care** |  |  |
| 1.1 | Assess patients, including identifying and prioritizing patient problems and medication-related needs | Patient assessment |
| 1.2 | Evaluate drug therapy for appropriateness, effectiveness, safety, adherence, and affordability | Drug therapy evaluation |
| 1.3 | Develop/initiate therapeutic plans and address medication-related problems | Therapeutic planning |
| 1.4 | Follow up on and assess the outcomes of therapeutic plans | Outcome monitoring |
| 1.5 | Collaborate with other members of the healthcare team to achieve optimal patient outcomes across the continuum of care | Team collaboration |
| 1.6 | Apply knowledge of the roles and responsibilities of pharmacists and pharmacist team members to provide care to patients | Professional role application |
| **II. Pharmacotherapy knowledge** |  |  |
| 2.1 | Demonstrate and apply in-depth knowledge of pharmacology, pharmacotherapy, pathophysiology, and disease processes | Pharmacotherapy knowledge |
| 2.2 | Locate, evaluate, interpret, and assimilate scientific and clinical evidence from biomedical and social-behavioral literature | Evidence retrieval |
| 2.3 | Use scientific and clinical evidence as the basis for therapeutic decision-making | Evidence-based practice |
| 2.4 | Maintain and enhance pharmacotherapy knowledge through self-assessment and lifelong learning | Knowledge maintenance |
| **III. Systems-based care and population health** |  |  |
| 3.1 | Use healthcare delivery systems and health informatics to optimize patient and population care | Health systems utilization |
| 3.2 | Participate in identifying systems-based errors and implementing solutions | Systems error management |
| 3.3 | Resolve medication-related problems to improve patient/population health and quality metrics | Medication problem resolution |
| 3.4 | Apply pharmacoeconomics and risk-benefit analysis to patient-specific and population-based care | Pharmacoeconomic application |
| 3.5 | Participate in developing processes to improve transitions of care | Transition of care |
| 3.6 | Design quality improvement processes to improve medication use | Quality improvement |
| **IV. Communication** |  |  |
| 4.1 | Communicate effectively with patients, caregivers, families, and healthcare professionals | Effective communication |
| 4.2 | Provide clear and concise consultations to other health professionals | Professional consultation |
| 4.3 | Develop professional written communications appropriate to the audience | Written communication |
| 4.4 | Use verbal communication tailored to clinical and patient-specific environments | Verbal communication |
| 4.5 | Communicate with appropriate assertiveness, confidence, empathy, and respect | Professional communication |
| **V. Professionalism** |  |  |
| 5.1 | Uphold the highest standards of integrity and honesty | Professional integrity |
| 5.2 | Commit to a fiduciary relationship with patients and work in their best interests | Patient-centered professionalism |
| 5.3 | Serve as a credible role model and leader for students, trainees, and colleagues | Professional leadership |
| 5.4 | Advance clinical pharmacy through stewardship, training, and professional engagement | Professional stewardship |
| **VI. Continuing professional development** |  |  |
| 6.1 | Commit to excellence and lifelong learning | Lifelong learning |
| 6.2 | Demonstrate self-awareness, self-assessment, and self-development skills | Self-development |
| 6.3 | Identify and implement strategies for professional improvement through CPD | Professional improvement |
| 6.4 | Provide professional education to students, trainees, or other health professionals | Professional education |

**Demographic characteristics of Delphi participants**

The expert panel primarily consisted of pharmacists; however, multidisciplinary healthcare professionals—including medical doctors, nurses, and dentists involved in healthcare policy and collaborative clinical practice—were also included to ensure broader interprofessional perspectives during framework development (Supplementary Table S4).

**Table S4. Demographic characteristics of Delphi participants**

| **Variable** | **Round 1**  **(n = 36)** | **Round 2**  **(n = 33)** | **Round 3**  **(n = 27)** |
| --- | --- | --- | --- |
| **Sex, n (%)** |  |  |  |
| Male | 10 (27.78) | 9 (27.27) | 7 (25.93) |
| Female | 26 (72.22) | 24 (72.73) | 20 (74.07) |
| **Age (years)** |  |  |  |
| Mean ± SD | 45.75 ± 11.07 | 45.54 ± 11.48 | 43.48 ± 10.77 |
| Range | 28–73 | 28–73 | 28–70 |
| **Highest education, n (%)** |  |  |  |
| Bachelor’s degree | 14 (38.89) | 14 (42.42) | 13 (48.15) |
| Master’s degree | 16 (44.44) | 13 (39.39) | 11 (40.74) |
| Doctoral degree | 5 (13.89) | 5 (15.15) | 3 (11.11) |
| Post-doctoral degree | 1 (2.78) | 1 (3.03) | 0 |
| **Professional field, n (%)** |  |  |  |
| Pharmacy | 31 (86.11) | 29 (87.88) | 24 (88.89) |
| Medicine | 3 (8.33) | 2 (6.06) | 1 (3.70) |
| Nursing | 1 (2.78) | 1 (3.03) | 1 (3.70) |
| Dentistry | 1 (2.78) | 1 (3.03) | 1 (3.70) |
| **Working experience (years)** |  |  |  |
| Mean ± SD | 22.75 ± 11.07 | 22.54 ± 11.48 | 20.48 ± 10.78 |
| Range | 5–50 | 5–50 | 5–47 |
| **Clinical pharmacy training, n (%)** |  |  |  |
| Yes | 28 (77.78) | 26 (78.79) | 24 (88.89) |
| No | 8 (22.22) | 7 (21.21) | 3 (11.11) |
| **Experience in clinical pharmacy practice, n (%)** |  |  |  |
| Yes | 31 (86.11) | 29 (87.88) | 25 (92.59) |
| No | 5 (13.89) | 4 (12.12) | 2 (7.41) |

**Table S5. Characteristics of pharmacy students participating in the EPA-tool validation study**

| **Variable** | **Students (n = 31)** |
| --- | --- |
| **Sex, n (%)** |  |
| Male | 8 (25.8) |
| Female | 23 (74.2) |
| **Age (years)** |  |
| Mean ± SD | 26.5 ± 4.9 |
| Range | 23–43 |
| **Religion, n (%)** |  |
| Buddhism | 20 (64.5) |
| Spirit | 11 (35.5) |
| **Regional area, n (%)** |  |
| Northern Lao PDR | 11 (35.5) |
| Central Lao PDR | 15 (48.4) |
| Southern Lao PDR | 5 (16.2) |
| **Ethnic group, n (%)** |  |
| Lao | 17 (54.8) |
| Hmong | 9 (29.1) |
| Akha | 2 (6.4) |
| Hor | 1 (3.2) |
| Lue | 1 (3.2) |
| Tai Daeng | 1 (3.2) |
| **Grade Point Average (GPA)** |  |
| Mean ± SD | 2.85 ± 0.40 |
| Range | 2.37–3.52 |
| **Clinical training setting, n (%)** |  |
| Setthathirath Hospital | 16 (51.6) |
| Mahosot Hospital | 15 (48.4) |
| **EPA-tool score** |  |
| Mean ± SD | 85.64 ± 0.41 |
| Range | 81–91 |
| **Pre-test score** |  |
| Mean ± SD | 3.23 ± 0.47 |
| Range | 1.88–4.27 |
| **Standard assessment tool (S-tool) score** |  |
| Mean ± SD | 68.87 ± 3.18 |
| Range | 31–91 |

**Abbreviations:** SD = standard deviation; EPA = Entrustable Professional Activities.

**Table S6. Internal consistency reliability analysis of the EPA-based assessment tool**

| **Competency domain/item** | **Corrected item-total correlation** | **Cronbach’s alpha if item deleted** | **Interpretation** |
| --- | --- | --- | --- |
| Direct patient care | 0.81 | 0.977 | High internal consistency |
| Pharmacotherapy knowledge | 0.88 | 0.978 | High internal consistency |
| Systems-based care and population health | 0.75 | 0.978 | High internal consistency |
| Communication | 0.83 | 0.976 | High internal consistency |
| Professionalism | 0.71 | 0.975 | High internal consistency |
| Continuing professional development | 0.73 | 0.978 | High internal consistency |

**Note:** The overall Cronbach’s alpha coefficient of the EPA-based assessment tool was 0.982, indicating excellent internal consistency reliability. Deletion of individual competency domains did not substantially affect the overall alpha coefficient.

**Abbreviation:** EPA = Entrustable Professional Activities.

**Figure S1. Mean relevance scores across clinical pharmacy competency domains**

Radar chart illustrating the average relevance scores of the six competency domains based on a 5-point Likert scale.


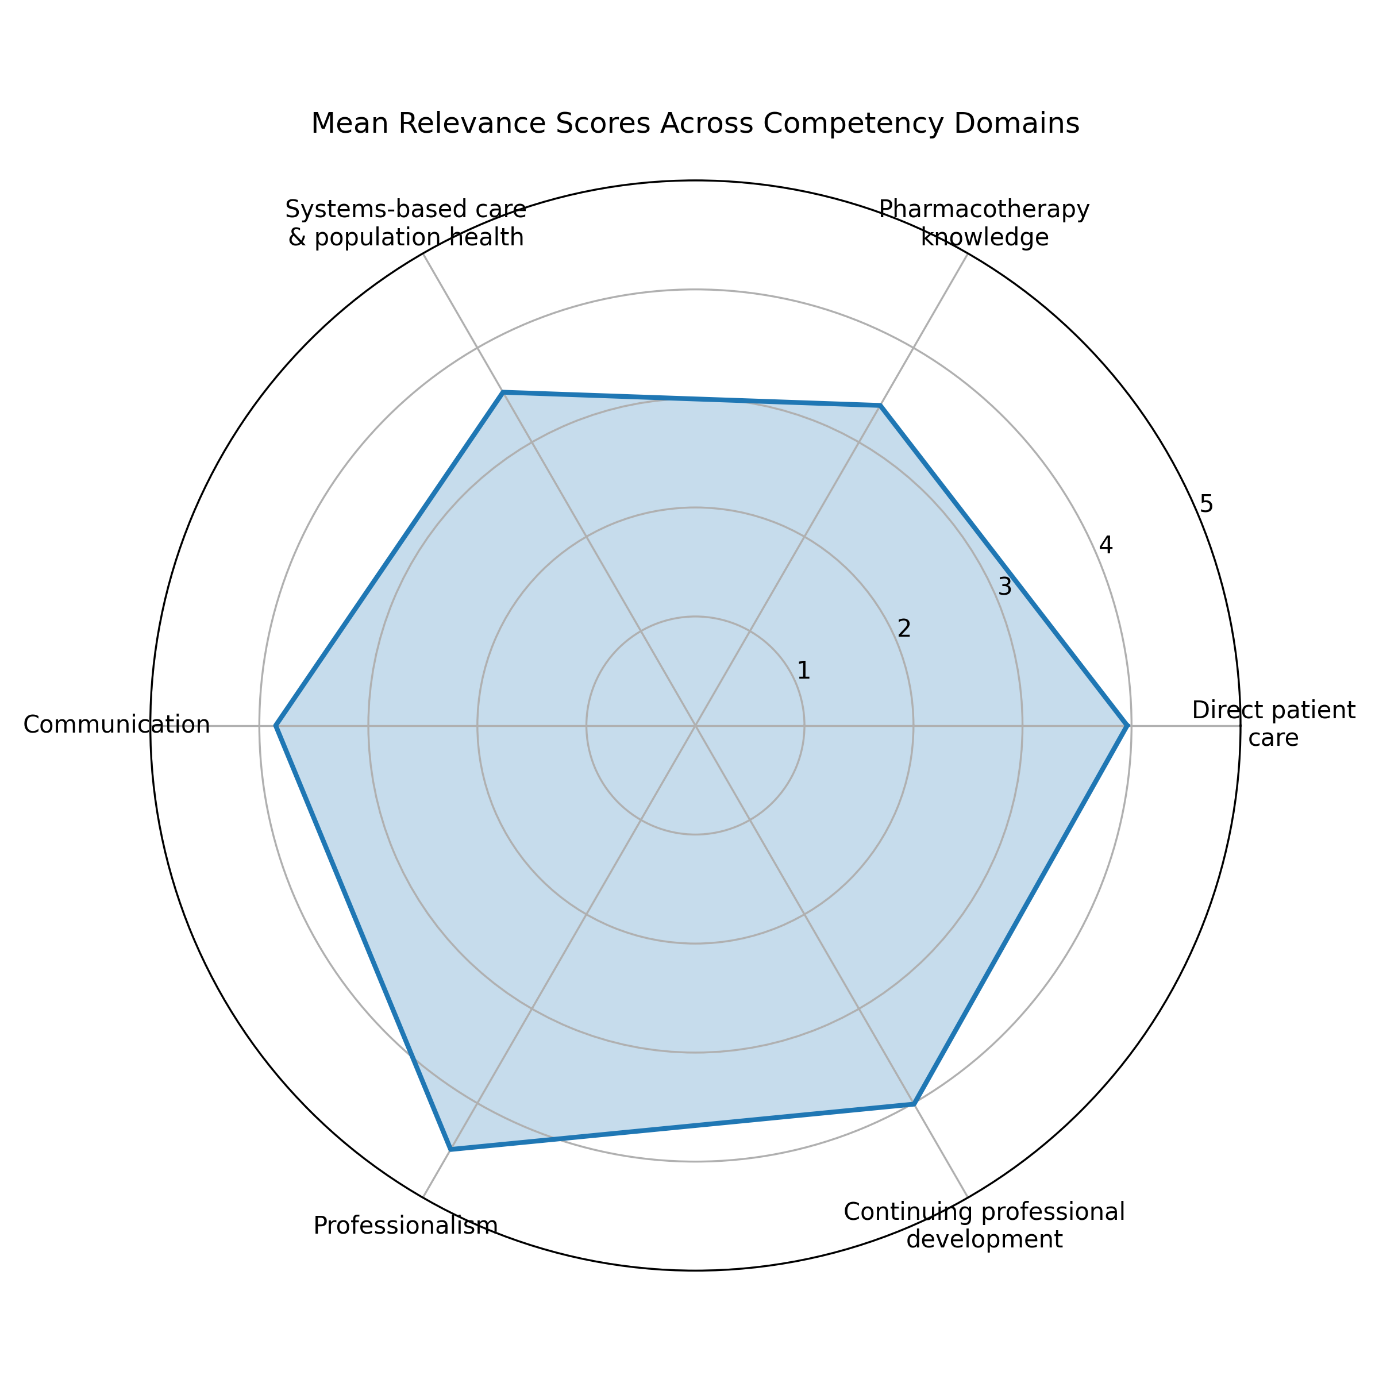

Supplement: Supplementary file 1 [file b9b198231b2a20b33e8eed74.docx]
